# Supplementary material for: The Impact of Natural Selection on Short Insertion and Deletion Variation in the Great Tit Genome
Source: PubMed Central journal article supplement (PMC6543879; doi:10.1093/gbe/evz068), 2019-03-29
Supplement: supplementary_material_evz068.pdf [file supplementary_material_evz068.pdf]

**Table S1** Estimates of polarisation error used to correct the site frequency spectrum prior to calculating the summary statistics. CDS estimates are from the best fit model in table S2, from the weakly deleterious site class, the ancestral repeat (AR) estimates are also from this model. Non-coding estimates are from the best fit model in table S3.

| Region     | $\epsilon_{ins}$ | $\epsilon_{del}$ |
|------------|------------------|------------------|
| CDS        | 0.0799           | 0.0368           |
| Non-coding | 0.0110           | 0.0166           |
| AR         | 0.0302           | 0.0261           |

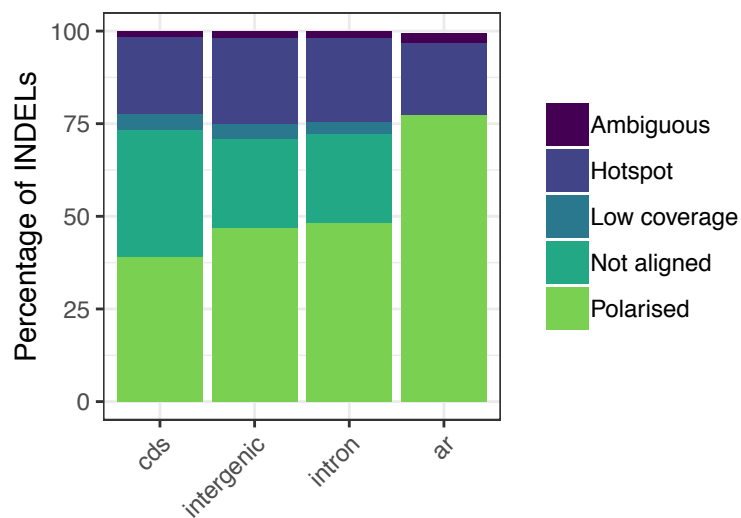

**Figure S1** Proportion of INDELs that were polarised in different genomic regions. 'Ambiguous' refers to sites where both great tit alleles are represented in the outgroups, for example due to ancestral polymorphism. Note that due to the way ancestral repeats (ar) were identified from the genome alignment, it is not possible for INDELs to fail polarisation due to being 'not aligned' or have 'low coverage'.

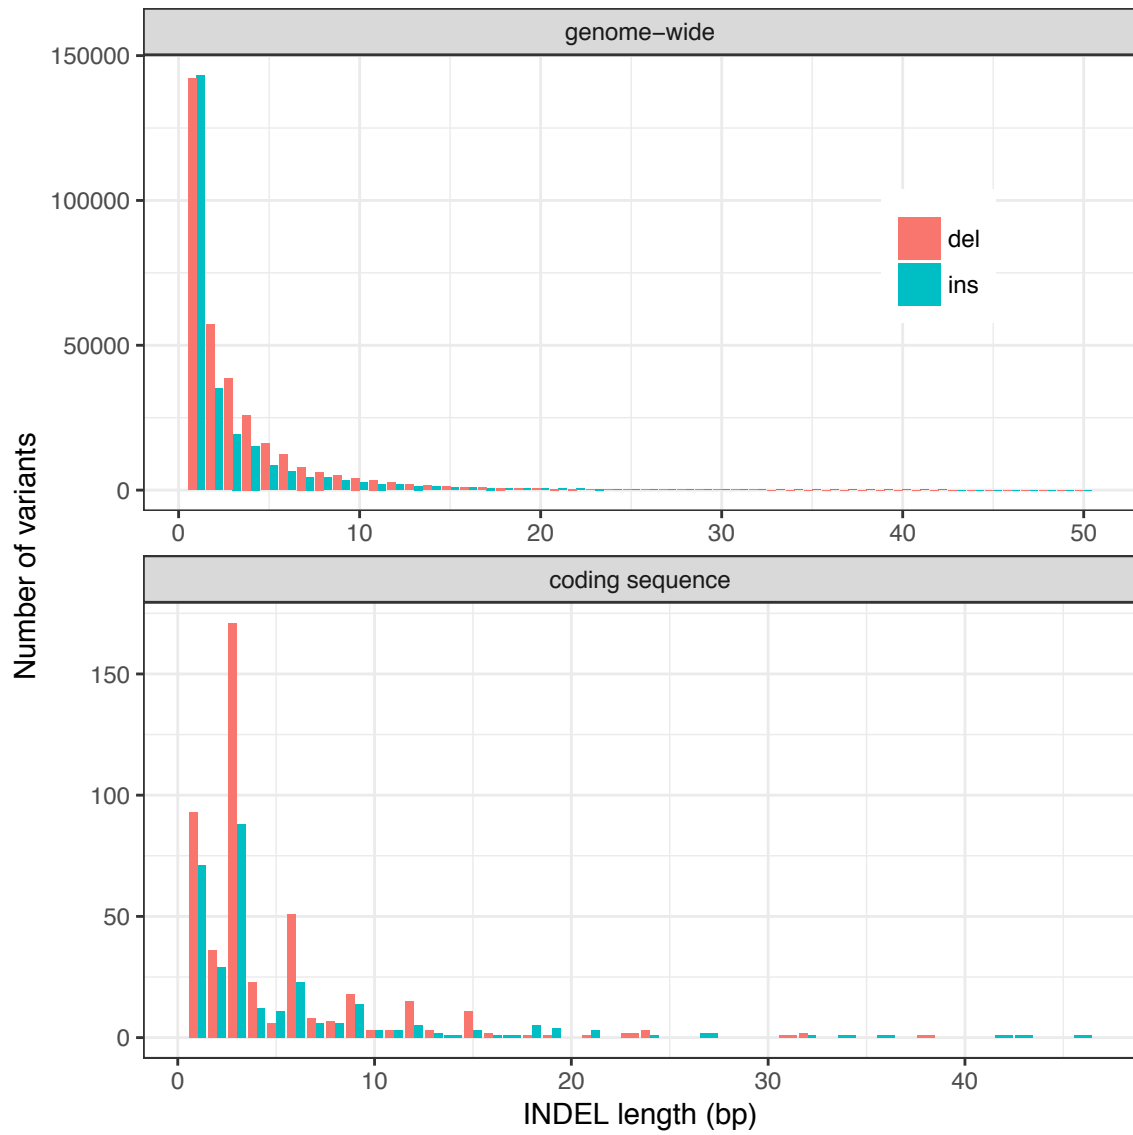

**Figure S2** Length distribution of short INDELs (50bp or less) both genome-wide and in coding sequence within the great tit genome.

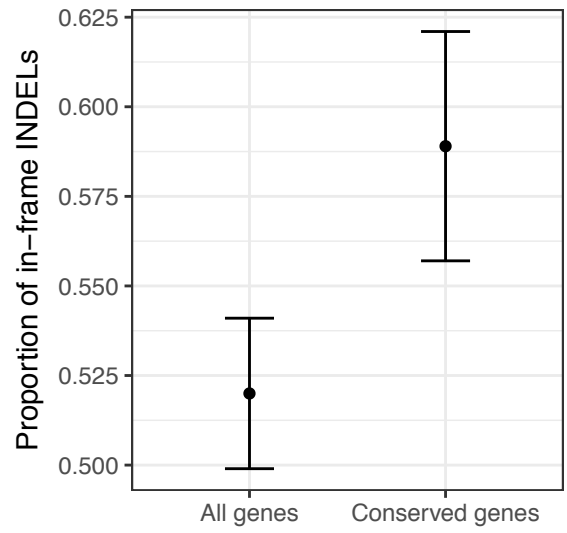

**Figure S3** Proportion of INDELs that preserve the reading frame (INDELs a multiple of 3 in length) in all genes compared to conserved genes.

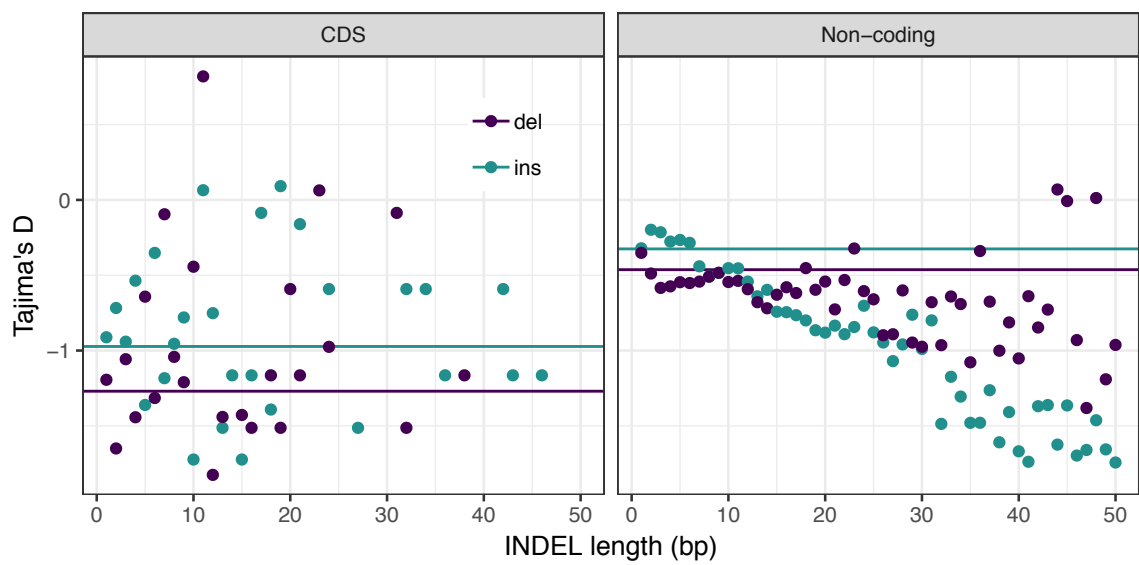

**Figure S4** Tajima's *D* for insertions and deletions of different lengths in both coding (CDS) and non-coding regions. Horizontal lines represent the estimates when not separated by length.

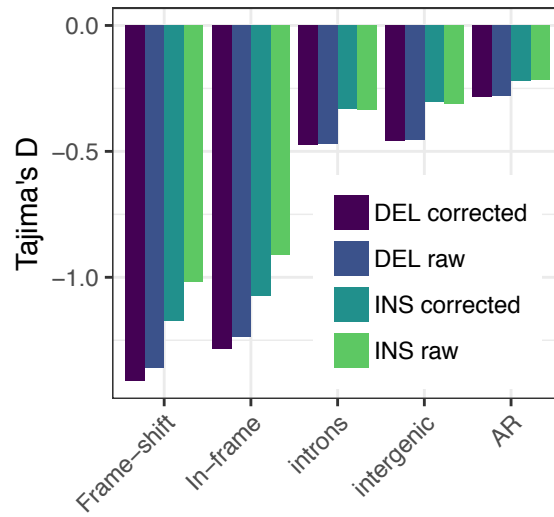

**Figure S5** Tajima's *D* estimates for insertions and deletions in different genomic contexts, before (raw) and after correcting for polarisation error (corrected).

**Table S2** Maximum likelihood parameter estimates for models assuming equal mutation rates between neutral and focal sites, fitted to coding sequence INDELs with INDELs in ancestral repeats as neutral reference. Where  $\Delta AIC = AIC(\text{best model}) - AIC(\text{lower ranked model})$ .

| Model           | Variants   | C | $\theta$              | $\gamma$ | scale | shape | $\varepsilon$         | $\alpha$ | $\Delta AIC$ |
|-----------------|------------|---|-----------------------|----------|-------|-------|-----------------------|----------|--------------|
| Discrete<br>C=2 | insertions | 1 | 4.92x10 <sup>-6</sup> | -1.14    | -     | -     | 0.0799                |          |              |
|                 | insertions | 2 | 0.000134              | -801     | -     | -     | 0.000307              | 71%      |              |
|                 | deletions  | 1 | 8.32x10 <sup>-6</sup> | -2.70    | -     | -     | 0.0368                |          |              |
|                 | deletions  | 2 | 0.000206              | -649     | -     | -     | 3.12x10 <sup>-7</sup> | 85%      | 0            |
| Discrete<br>C=3 | insertions | 1 | 7.32x10 <sup>-7</sup> | 10000    | -     | -     | 0.00144               |          |              |
|                 | insertions | 2 | 0.000141              | -748     | -     | -     | 0.0870                |          |              |
|                 | insertions | 3 | 4.04x10 <sup>-6</sup> | -2.56    | -     | -     | 4.81x10 <sup>-5</sup> | 91%      |              |
|                 | deletions  | 1 | 1.17x10 <sup>-6</sup> | 83.3     | -     | -     | 0.00137               |          |              |
|                 | deletions  | 2 | 9.70x10 <sup>-6</sup> | -5.94    | -     | -     | 0.0297                |          |              |
|                 | deletions  | 3 | 0.000208              | -859     | -     | -     | 0.000368              | 99%      | -5.17        |
| Continuous      | insertions | 1 | 0.000130              | -1498    | 2284  | 0.656 | 0.0685                | 100%     |              |
|                 | deletions  | 1 | 0.000204              | -1551    | 2326  | 0.667 | 0.0442                | 100%     | -106         |
| Discrete<br>C=1 | insertions | 1 | 0.000103              | -37.4    | -     | -     | 0.149                 | 100%     |              |
|                 | deletions  | 1 | 0.000171              | -70.4    | -     | -     | 0.0592                | 100%     | -2741        |

**Table S3** Maximum likelihood parameter estimates for models assuming equal mutation rates between neutral and focal sites, fitted to coding sequence INDELs with INDELs in non-coding regions as neutral reference. Where  $\Delta AIC = AIC(\text{best model}) - AIC(\text{lower ranked model})$ .

| Model           | Variants   | C | $\theta$               | $\gamma$ | scale | shape | $\varepsilon$         | $\alpha$ | $\Delta AIC$ |
|-----------------|------------|---|------------------------|----------|-------|-------|-----------------------|----------|--------------|
| Discrete<br>C=2 | insertions | 1 | 4.79x10 <sup>-6</sup>  | -0.264   | -     | -     | 0.0729                |          |              |
|                 | insertions | 2 | 0.000156               | -897     | -     | -     | 0.000526              | 63%      |              |
|                 | deletions  | 1 | 7.79x10 <sup>-6</sup>  | -1.70    | -     | -     | 0.0366                |          |              |
|                 | deletions  | 2 | 0.000205               | -629     | -     | -     | 0.00587               | 79%      | 0            |
| Discrete<br>C=3 | insertions | 1 | 6.59x10 <sup>-6</sup>  | -2.23    | -     | -     | 0.0202                |          |              |
|                 | insertions | 2 | 7.91 x10 <sup>-5</sup> | -1011    | -     | -     | 0.0491                |          |              |
|                 | insertions | 3 | 7.76x10 <sup>-5</sup>  | -2738    | -     | -     | 0.453                 | 85%      |              |
|                 | deletions  | 1 | 4.90x10 <sup>-6</sup>  | 0.597    | -     | -     | 0.0839                |          |              |
|                 | deletions  | 2 | 1.52x10 <sup>-5</sup>  | -21.1    | -     | -     | 0.000163              |          |              |
|                 | deletions  | 3 | 0.000195               | -2483    | -     | -     | 1.43x10 <sup>-5</sup> | 100%     | -13.8        |
| Continuous      | insertions | 1 | 0.000154               | -1614    | 2413  | 0.669 | 0.0667                | 100%     |              |
|                 | deletions  | 1 | 0.000209               | -1553    | 2401  | 0.647 | 0.0470                | 100%     | -147         |
| Discrete<br>C=1 | insertions | 1 | 0.000153               | -54.9    | -     | -     | 0.141                 | 100%     |              |
|                 | deletions  | 1 | 0.000208               | -75.7    | -     | -     | 0.0648                | 100%     | -3210        |

**Table S4** Maximum likelihood parameter estimates for models with mutation rates free to vary between neutral and focal sites, fitted to non-coding INDELS. Where  $\Delta AIC = AIC(\text{best model}) - AIC(\text{lower ranked model})$ .

| Model           | Variants   | C | $\theta$              | $\gamma$ | scale | shape  | $\varepsilon$         | $\Delta AIC$ |
|-----------------|------------|---|-----------------------|----------|-------|--------|-----------------------|--------------|
| Continuous      | insertions | 1 | 0.000170              | -53.6    | 1553  | 0.0345 | 0.0110                | 0            |
|                 | deletions  | 1 | 0.000293              | -75.5    | 715   | 0.106  | 0.0166                |              |
| Discrete<br>C=2 | insertions | 1 | $3.23 \times 10^{-5}$ | 4.64     | -     | -      | 0.0358                | -3.43        |
|                 | insertions | 2 | 0.000122              | -1.44    | -     | -      | 0.00293               |              |
|                 | deletions  | 1 | 0.000113              | 1.15     | -     | -      | 0.00306               |              |
|                 | deletions  | 2 | 0.000117              | -5.33    | -     | -      | 0.0231                |              |
| Discrete<br>C=3 | insertions | 1 | $1.20 \times 10^{-5}$ | 99852    | -     | -      | 0.463                 | -10.9        |
|                 | insertions | 2 | 0.000141              | -0.514   | -     | -      | 0.0241                |              |
|                 | insertions | 3 | 0.000282              | -879     | -     | -      | $8.59 \times 10^{-6}$ |              |
|                 | deletions  | 1 | $3.26 \times 10^{-5}$ | 4.67     | -     | -      | 0.127                 |              |
|                 | deletions  | 2 | 0.000169              | -127     | -     | -      | 0.0327                |              |
|                 | deletions  | 3 | 0.000172              | -1.65    | -     | -      | 0.0294                |              |
| Discrete<br>C=1 | insertions | 1 | 0.000161              | -0.204   | -     | -      | 0.0584                | -131         |
|                 | deletions  | 1 | 0.000223              | -0.831   | -     | -      | 0.0451                |              |

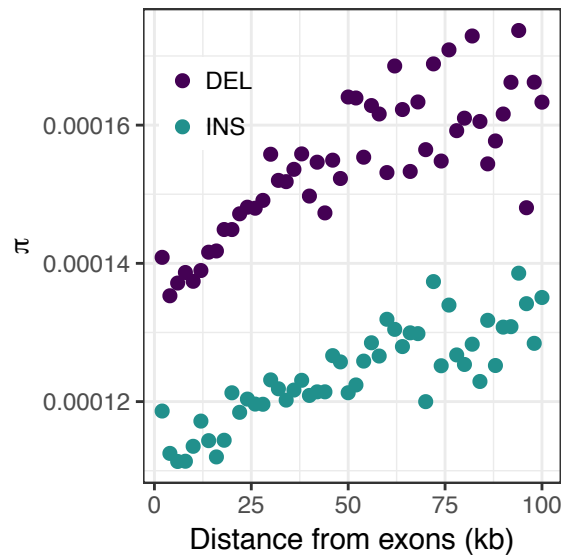

**Figure S6** The relationship between INDEL diversity and distance from exons. Each point represents a 2kb bin.

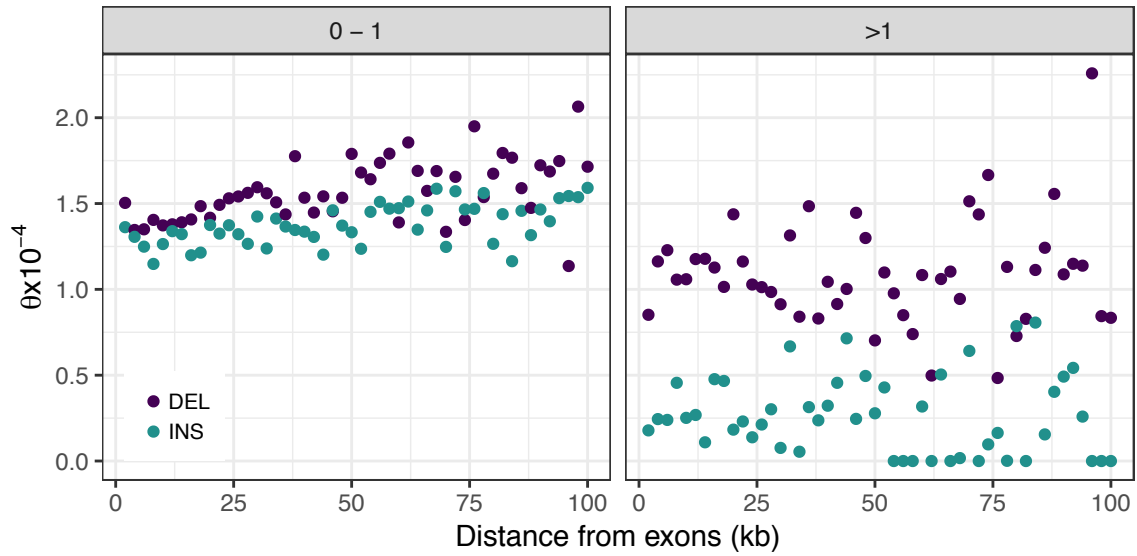

**Figure S7** The relationship between  $\theta$  and distance from exons for putatively neutral INDELS (left panel,  $-\gamma$  between 0 and 1) and negatively selected INDELS (right panel,  $-\gamma > 1$ ). Insertions (INS) in turquoise and deletions (DEL) in purple. Each point represents a 2kb bin.

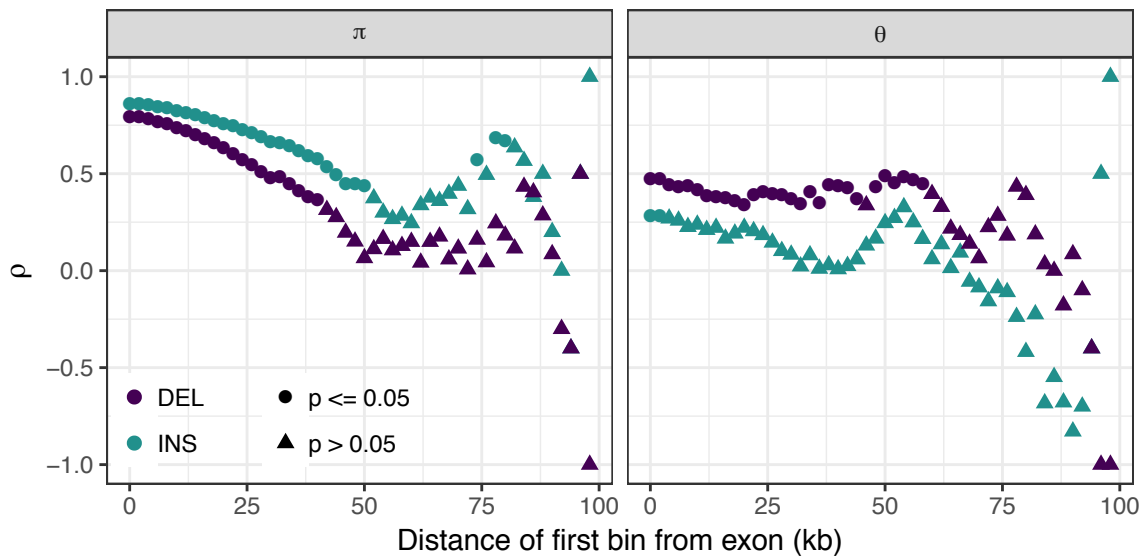

**Figure S8** The strength and significance of Spearman's correlations between distance from exons and nucleotide diversity (left) and model based estimates of the scaled mutation rate (right), with increasingly cumulatively down sampled datasets, reduced by iteratively removing the bin nearest to exons for each correlation.

**Table S5** Maximum likelihood parameter estimates for the best-fit model with mutation rates free to vary between neutral and focal sites, fitted to coding INDELS.

| Model      | Variants   | C | $\theta$              | $\gamma$ | scale | shape | $\varepsilon$ |
|------------|------------|---|-----------------------|----------|-------|-------|---------------|
| Continuous | insertions | 1 | $2.22 \times 10^{-5}$ | -336     | 986   | 0.341 | 0.0339        |
|            | deletions  | 1 | $5.38 \times 10^{-5}$ | -374     | 758   | 0.494 | 0.0169        |
